# Supplementary material for: An essential cell-autonomous role for hepcidin in cardiac iron homeostasis
Source: eLife. 2016 Nov 29;5:e19804. doi: 10.7554/eLife.19804 (PMC5176354; doi:10.7554/eLife.19804)
Supplement: Figure 2—source data 1. — DOI: http://dx.doi.org/10.7554/eLife.19804.012 [file elife-19804-fig2-data1.xlsx]

## Sheet: 2I
3 months
	group 1								mean	STDEV	SEM	T test
Hamp fl/fl	18.95	20.36	19.34	6.25	7.39	7.75	4.97	17.5	12.8138	6.5199	2.46429
	group 2								mean	STDEV	SEM	0.717226
Hamp fl/fl;Myh6.Cre+	10.94	12.71	19.34	26.4	7.95	7.95	14.37	12.43	14.0113	5.99009	2.26404
6 months
	group 1											mean	STDEV	SEM	T test
Hamp fl/fl	12.73	19.76	20.4	18.29	14.23	14.37	18	16.03	16.29	12.95	15.53	16.2345	2.54909	0.806094
	group 2											mean	STDEV	SEM	0.0433611
Hamp fl/fl;Myh6.Cre+	102.98	20.98	25.15	18.56	86.17	21.74	9.84	20.21	44.49	28.67	18.01	36.0727	29.6604	9.37943
9 months
	group 1					mean	STDEV	SEM	T test
Hamp fl/fl	9.9	28.41	29.16	21.86	16.22	21.11	6.0869	3.04345
	group 2					mean	STDEV	SEM	0.0439068
Hamp fl/fl;Myh6.Cre+	47.98	29.06	50.65	18.09	55.3	40.216	17.6573	8.82865

## Sheet: 2J
3 months
	group 1								mean	STDEV	SEM	T test
Hamp fl/fl	51.94	53.73	52.38	30.21	28.71	24.47	32.73	44.27	39.805	11.6597	4.40695
	group 2								mean	STDEV	SEM	0.706751
Hamp fl/fl;Myh6.Cre+	34.71	50.58	35.52	47.33	31.01	31.01	38.94	34	37.8875	7.08785	2.67896
6 months
	group 1											mean	STDEV	SEM	T test
Hamp fl/fl	39.71	40.51	44.83	60.84	42.69	43.12	28.7	71.85	35.94	35.71	43.52	44.3109	11.7915	3.7288
	group 2											mean	STDEV	SEM	0.0465639
Hamp fl/fl;Myh6.Cre+	127.76	38.15	56.19	44.21	107.59	57.06	36.64	71.72	83.9	47.35	44.33	64.9909	29.2639	9.25406
9 months
	group 1					mean	STDEV	SEM	T test
Hamp fl/fl	48.63	61.97	68.35	61.91	39.44	56.06	12.6836	6.34178
	group 2					mean	STDEV	SEM	0.0416428
Hamp fl/fl;Myh6.Cre+	85.44	74.55	86.92	59.06	62.33.3	76.4925	13.9591	6.97954

## Sheet: 2K
3 months
	group 1								mean	STDEV	SEM	T test
Hamp fl/fl	63.5156	62.1068	63.0775	79.3115	74.2598	68.3286	84.8152	60.4698	69.4856	8.70333	3.28955
	group 2								mean	STDEV	SEM	0.292855
Hamp fl/fl;Myh6.Cre+	68.4817	74.8715	45.5518	44.2214	74.3631	74.3631	63.0971	63.4412	63.5489	12.0227	4.54415
6 months
	group 1											mean	STDEV	SEM	T test
Hamp fl/fl	67.9426	51.2219	50.0335	26.5607	66.6667	66.6744	82.5784	73.5143	54.6745	80.5377	59.7197	61.8295	15.5915	4.93046
	group 2											mean	STDEV	SEM	0.019913
Hamp fl/fl;Myh6.Cre+	19.3957	57.1127	55.2411	48.1206	19.9089	59.0275	58.1441	32.0692	46.9726	39.4509	59.3729	44.9833	14.8788	4.7051
9 months
	group 1					mean	STDEV	SEM	T test
Hamp fl/fl	76.8932	55.1316	60.2634	64.6907	62.6611	63.928	4.12182	2.06091
	group 2					mean	STDEV	SEM	0.0340362
Hamp fl/fl;Myh6.Cre+	34.4803	56.9953	42.728	55.6745	62.33.3	47.4695	7.88364	3.94182
