# Supplementary material for: An essential cell-autonomous role for hepcidin in cardiac iron homeostasis
Source: eLife. 2016 Nov 29;5:e19804. doi: 10.7554/eLife.19804 (PMC5176354; doi:10.7554/eLife.19804)
Supplement: Figure 3—source data 1. — DOI: http://dx.doi.org/10.7554/eLife.19804.015 [file elife-19804-fig3-data1.xlsx]

## Sheet: 3j
3 months
Slc40a1 C326Y fl/fl	group 1						mean	STDEV	SEM	T test
	20.67	10.69	26.2	27.5	21.88	15.36	20.3833	6.41868	2.87052
Slc40a1 C326Y fl/fl; Myh6.Cre+	group2						mean	STDEV	SEM	0.291656
	17.9	19.05	18.87	11.34	18.75	17.13	17.1733	2.94768	1.31824
6 months
Slc40a1 C326Y fl/fl	group 1						mean	STDEV	SEM	T test
	20.3	9.83	17.19	7.31	9.91	20.92	14.2433	5.93751	2.65534
Slc40a1 C326Y fl/fl; Myh6.Cre+	group2						mean	STDEV	SEM	0.00259368
	41.28	57.15	21.31	26.65	40.32	34.63	36.89	12.6032	5.63633
9 months
Slc40a1 C326Y fl/fl	group 1					mean	STDEV	SEM	T test
	29.54	10.05	10.58	8.589	8.35	13.4218	9.05981	4.5299
Slc40a1 C326Y fl/fl; Myh6.Cre+	group 2					mean	STDEV	SEM	0.0329528
	114.56	32.53	120.25	35.58	33.21	67.226	45.8651	22.9325

## Sheet: 3k
3 months
Slc40a1 C326Y fl/fl	group 1						mean	STDEV	SEM	T test
	57.86	42.93	75.99	57.12	47.32	55.36	56.0967	11.4091	5.10229
Slc40a1 C326Y fl/fl; Myh6.Cre+	group2						mean	STDEV	SEM	0.152723
	39.55	47.73	49.53	40.66	54.95	54.27	47.7817	6.55776	2.93272
6 months
Slc40a1 C326Y fl/fl	group 1						mean	STDEV	SEM	T test
	61.69	43.53	64.96	45.58	49.91	35.89	50.26	11.1405	4.98217
Slc40a1 C326Y fl/fl; Myh6.Cre+	group2						mean	STDEV	SEM	0.0434071
	114.11	118.16	48.65	63.27	60.32	74.63	79.8567	29.3203	13.1125
9 months
Slc40a1 C326Y fl/fl	group 1					mean	STDEV	SEM	T test
	78.26	44.82	56.12	19.12	22.1	44.084	24.5963	12.2981
Slc40a1 C326Y fl/fl; Myh6.Cre+	group 2					mean	STDEV	SEM	0.0470979
	125.29	48.1	135.66	145.18	49.12	100.67	48.0432	24.0216

## Sheet: 3l
3 months
Slc40a1 C326Y fl/fl	group 1						mean	STDEV	SEM	T test
	72.2758	75.099	65.5218	61.8557	53.7616	75.36	67.3123	8.56313	3.82955
Slc40a1 C326Y fl/fl; Myh6.Cre+	group2						mean	STDEV	SEM	0.288675
	54.7408	60.088	61.9019	74.6082	64.3849	58.0053	62.2882	6.87711	3.07554
6 months
Slc40a1 C326Y fl/fl	group 1						mean	STDEV	SEM	T test
	71.7455	72.8233	71.3309	77.3804	73.15	70.12	72.7584	2.51179	1.12331
Slc40a1 C326Y fl/fl; Myh6.Cre+	group2						mean	STDEV	SEM	0.000930047
	56.1364	42.1616	46.5663	57.8789	49.32	69.63	53.6156	9.80132	4.38328
9 months
Slc40a1 C326Y fl/fl	group 1					mean	STDEV	SEM	T test
	82.8525	46.8792	80.12	79.35	42.12	66.2643	19.982	9.99098
Slc40a1 C326Y fl/fl; Myh6.Cre+	group 2					mean	STDEV	SEM	0.023261
	24.6545	57.3746	25.35	29.15	42.15	35.7358	13.9947	6.99737
