# Supplementary material for: An essential cell-autonomous role for hepcidin in cardiac iron homeostasis
Source: eLife. 2016 Nov 29;5:e19804. doi: 10.7554/eLife.19804 (PMC5176354; doi:10.7554/eLife.19804)
Supplement: Figure 4—source data 1. — DOI: http://dx.doi.org/10.7554/eLife.19804.020 [file elife-19804-fig4-data1.xlsx]

## Sheet: 4a
-IRON
Hamp fl/fl	group 1					mean	STDEV	SEM	T test
	8.73	17.76	22.4	14.23	14.37	15.498	4.50423	2.25211
Hamp fl/fl;Myh6.Cre+	group 2					mean	STDEV	SEM	0.0479576
	42.98	20.15	74.17	18.94	41.21	39.49	20.0708	10.0354
+IRON
Hamp fl/fl	group 3					mean	STDEV	SEM	T test
	12.24	7.35	10.15	14.77	10.23	10.948	2.46475	1.23237
Hamp fl/fl;Myh6.Cre+	group 4					mean	STDEV	SEM	0.0781178
	20.02	13.19	15.36	10.87	14.98	14.884	3.01981	1.5099

## Sheet: 4b
-IRON
Hamp fl/fl	group 1					mean	STDEV	SEM	T test
	49.71	35.94	35.71	43.52	48.2	42.616	5.90906	2.95453
Hamp fl/fl;Myh6.Cre+	group 2					mean	STDEV	SEM	0.0310084
	50.19	104.59	53.06	61.72	83.9	70.692	20.6651	10.3326
+IRON
Hamp fl/fl	group 3					mean	STDEV	SEM	T test
	42.16	26.81	26.81	58.31	37.23	38.264	11.666	5.833
Hamp fl/fl;Myh6.Cre+	group 4					mean	STDEV	SEM	0.289922
	46.35	53.49	48.89	34.94	44.98	45.73	6.12494	3.06247

## Sheet: 4c
-IRON
Hamp fl/fl	group 1					mean	STDEV	SEM	T test
	72.5784	73.5143	54.6745	70.5377	59.7197	66.2049	7.58723	3.79362
Hamp fl/fl;Myh6.Cre+	group 2					mean	STDEV	SEM	0.0044486
	32.0692	44.9726	39.4509	59.3729	37.9089	42.7549	9.26996	4.63498
+IRON
Hamp fl/fl	group 3					mean	STDEV	SEM
	70.9677	76.3148	62.141	74.6699	71.0258	71.0238	4.90298	2.45149
Hamp fl/fl;Myh6.Cre+	group 4					mean	STDEV	SEM	0.205868
	62.0235	67.7996	69.8173	68.8895	67.298	67.1656	2.71529	1.35765
