# Supplementary figures and images for: An essential cell-autonomous role for hepcidin in cardiac iron homeostasis
Source: eLife journal article supplement (doi:10.7554/elife.19804), 2016-11-29

Figure 3- Figure supplement 2

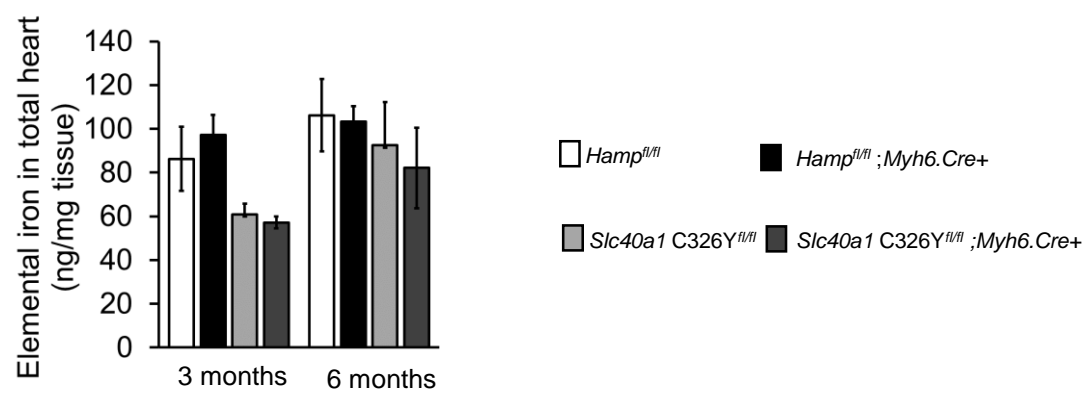

Supplement: supp [file elife-19804-supp-v1.zip]

Figure 1- Figure supplement 3

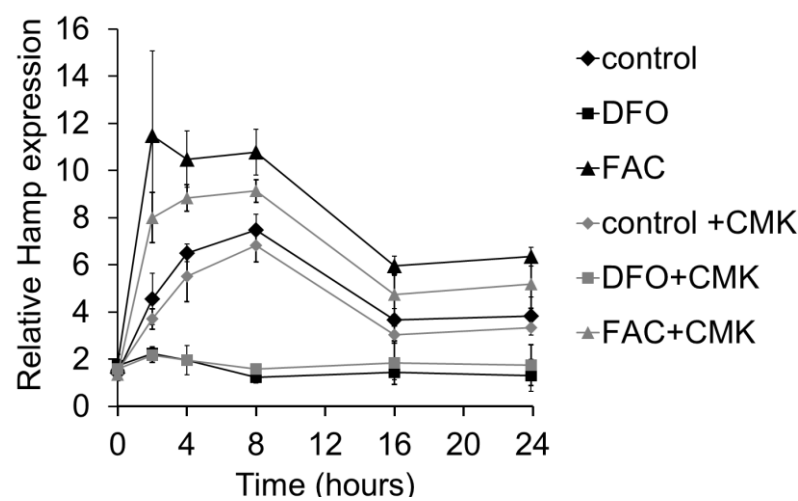

Supplement: supp [file elife-19804-supp-v1.zip]

Figure 1- Figure supplement 2

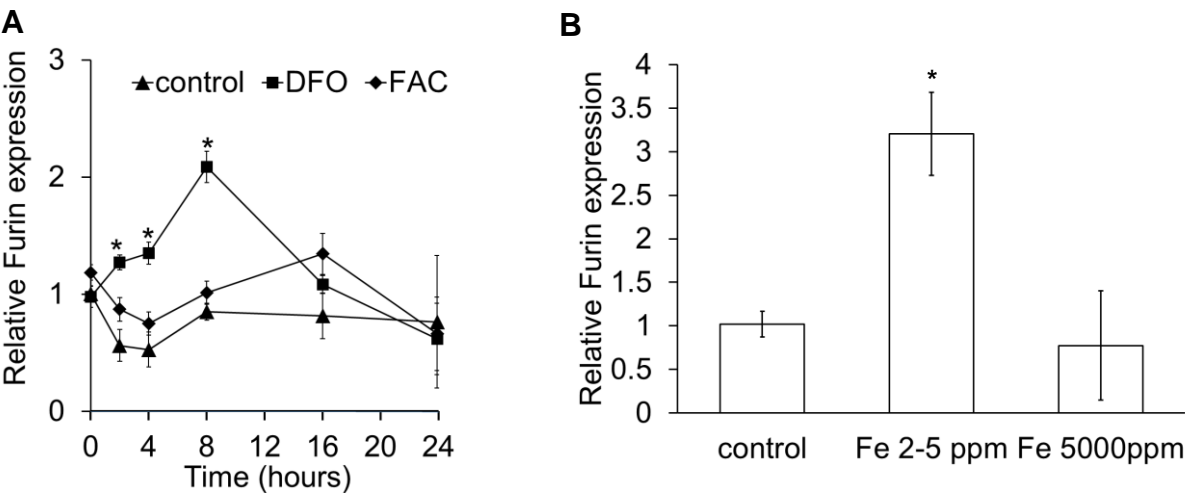

Supplement: supp [file elife-19804-supp-v1.zip]

Figure 1- Figure supplement 5

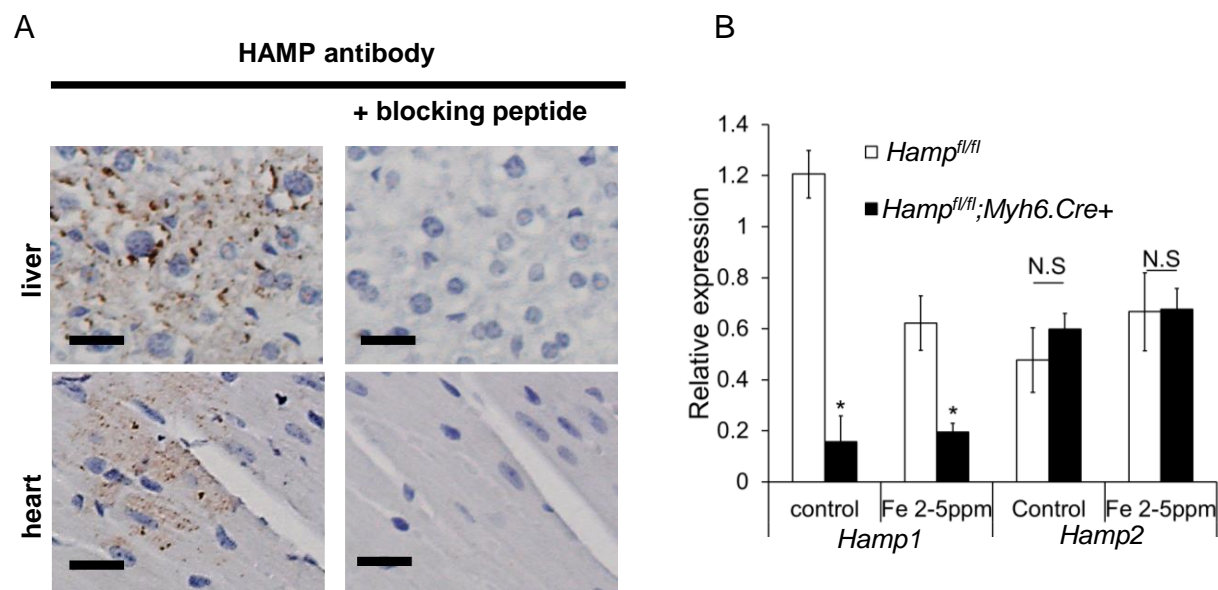

Supplement: supp [file elife-19804-supp-v1.zip]

Figure 1- Figure supplement 1

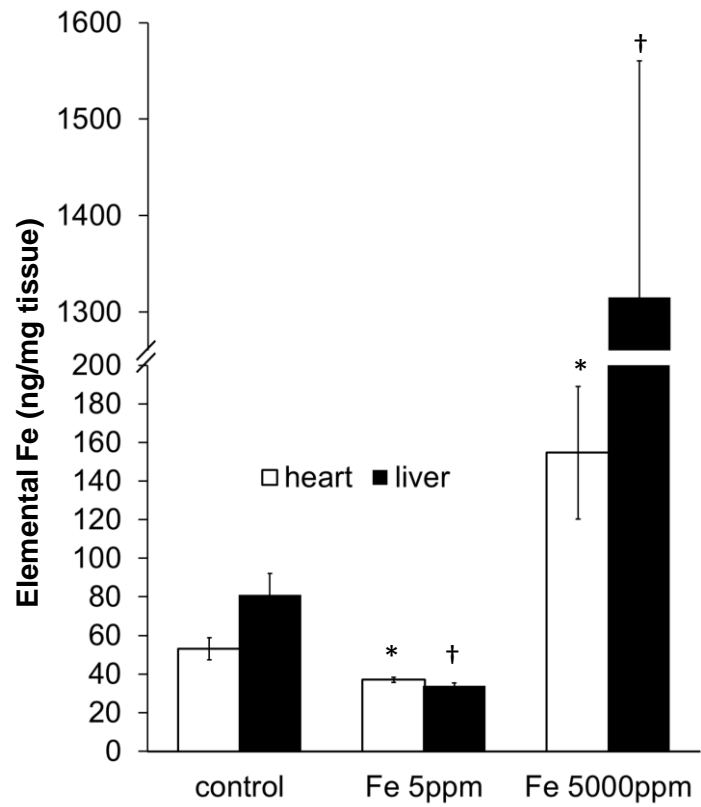

Supplement: supp [file elife-19804-supp-v1.zip]

Figure 3- Figure supplement 1

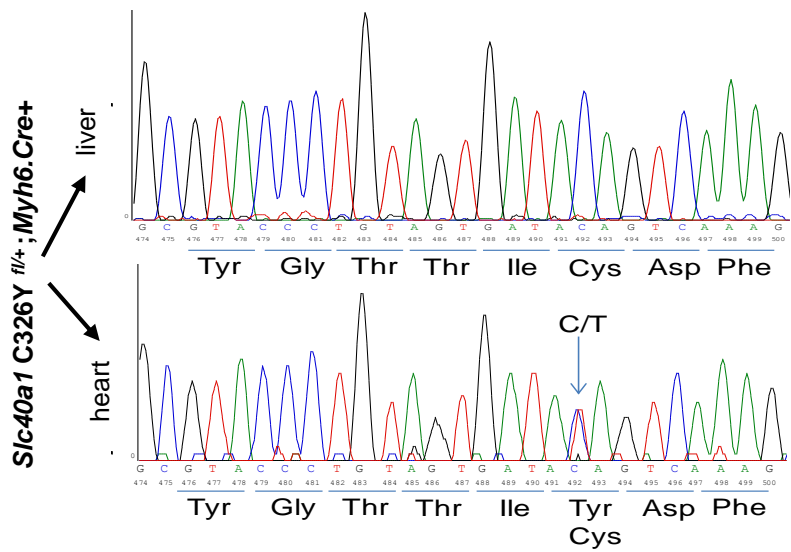

Supplement: supp [file elife-19804-supp-v1.zip]

Figure 1- Figure supplement 4

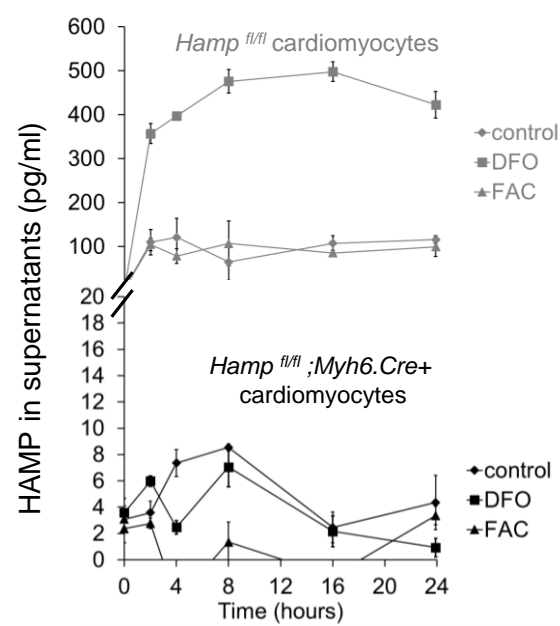

Supplement: supp [file elife-19804-supp-v1.zip]
